# Supplementary material for: Low Hysteresis and Fatigue-Resistant Polyvinyl Alcohol/Activated Charcoal Hydrogel Strain Sensor for Long-Term Stable Plant Growth Monitoring
Source: MDPI journal article supplement (doi:10.3390/polym15010090), 2022-12-26
Supplement: s1 [file s1]

SUPPLEMENTARY INFORMATION FOR

# Low Hysteresis and Fatigue-Resistant Polyvinyl Alcohol/Activated Charcoal Hydrogel Strain Sensor for Long-Term Stable Plant Growth Monitoring

Lina Wang <sup>1,2,†</sup>, Zhilin Zhang <sup>1,2,†</sup>, Jie Cao <sup>1,†</sup>, Wenqian Zheng <sup>1,2</sup>, Qi Zhao <sup>1</sup>, Wenna Chen <sup>2</sup>, Xinye Xu <sup>1,2</sup>, Xiaoyu Luo <sup>1,2</sup>, Qi Liu <sup>1,2</sup>, Ximei Liu <sup>1,2</sup>, Jingkun Xu <sup>1,3,\*</sup>, Baoyang Lu <sup>1,2,\*</sup>

<sup>1</sup> Jiangxi Key Lab of Flexible Electronics, Flexible Electronics Innovation Institute, Jiangxi Science and Technology Normal University, Nanchang 330013, China

<sup>2</sup> School of Pharmacy, Jiangxi Science and Technology Normal University, Nanchang 330013, China

<sup>3</sup> School of Chemistry and Molecular Engineering, Qingdao University of Science and Technology, Qingdao 266042, China

\* Correspondence: xujingkun1971@yeah.net (J.X.); luby@jxstnu.edu.cn (B.L.); Tel.: +86-791-88537967 (B.L.)

† These authors contributed equally to this work.

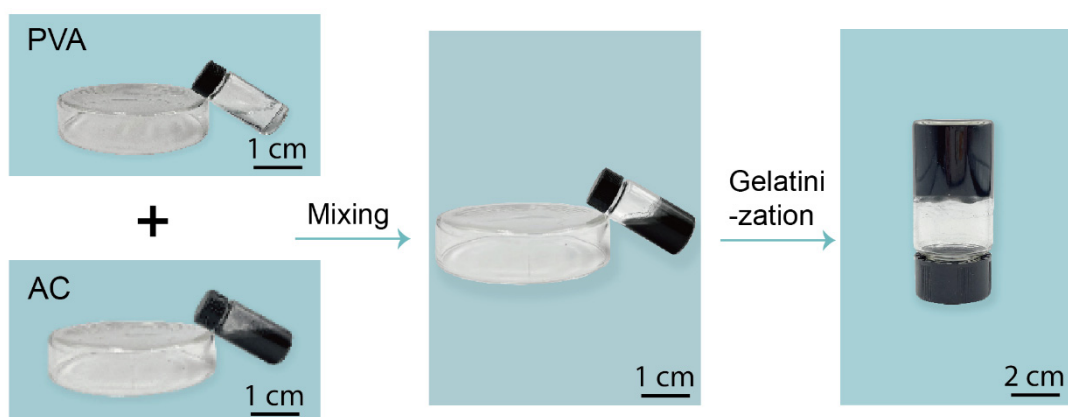

**Figure S1:** Photograph of the PVA-AC hydrogel preparation process.

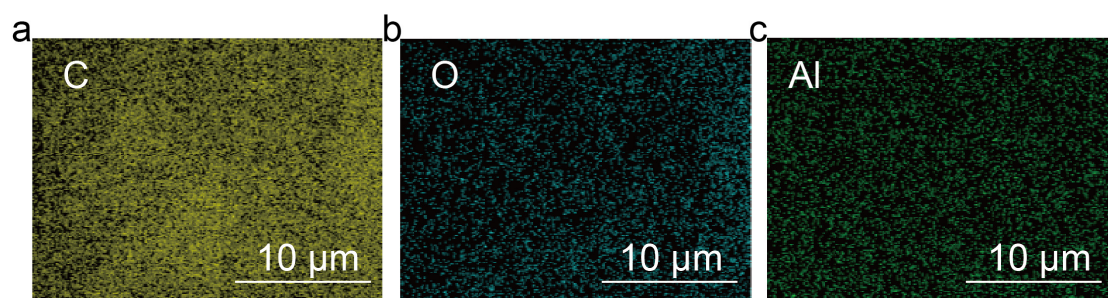

**Figure S2:** Elemental mapping analysis of PVA-AC from cross-sectional morphologies of Scanning Electron Microscope.

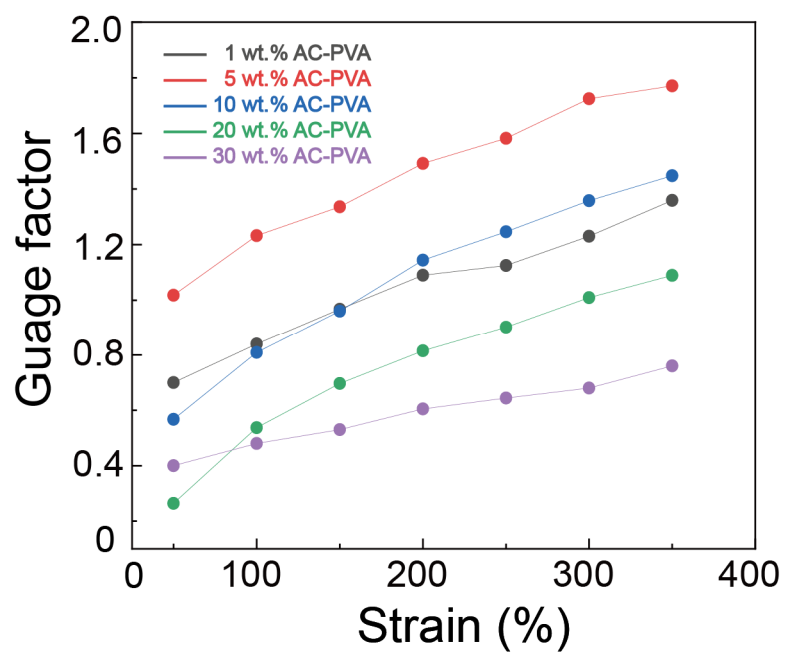

**Figure S3:** Gauge factor (GF) of PVA-AC hydrogel strain sensors with different AC concentrations.

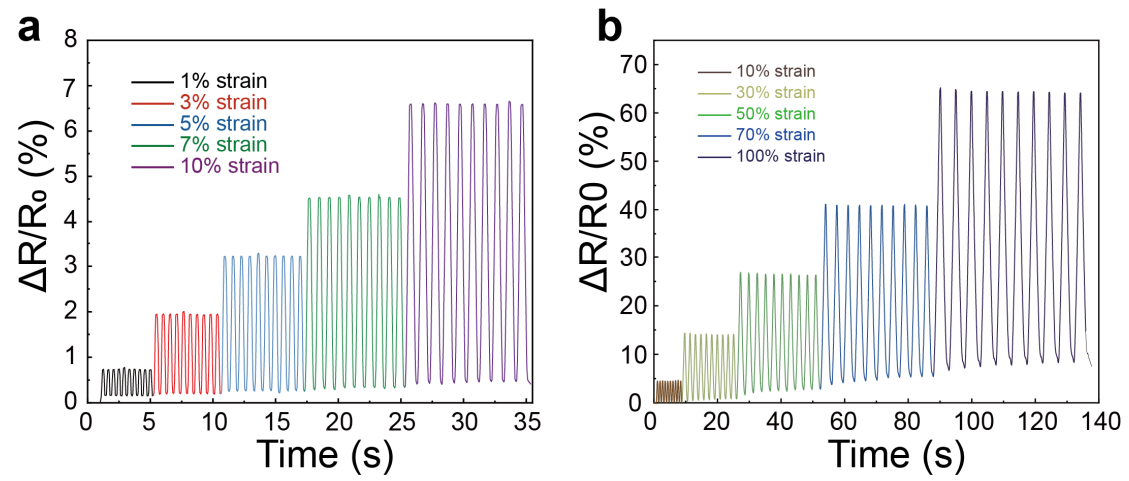

**Figure S4.** The relative resistant change of the PVA-AC conducting hydrogel strain sensor at the strain of 1%-10% and 10%-100%.
